# Supplementary material for: Update on a brain-penetrant cardiac glycoside that can lower cellular prion protein levels in human and guinea pig paradigms
Source: PubMed Central journal article supplement (PMC11421771; doi:10.1371/journal.pone.0308821), 2024-09-24

# S1 Fig

## A

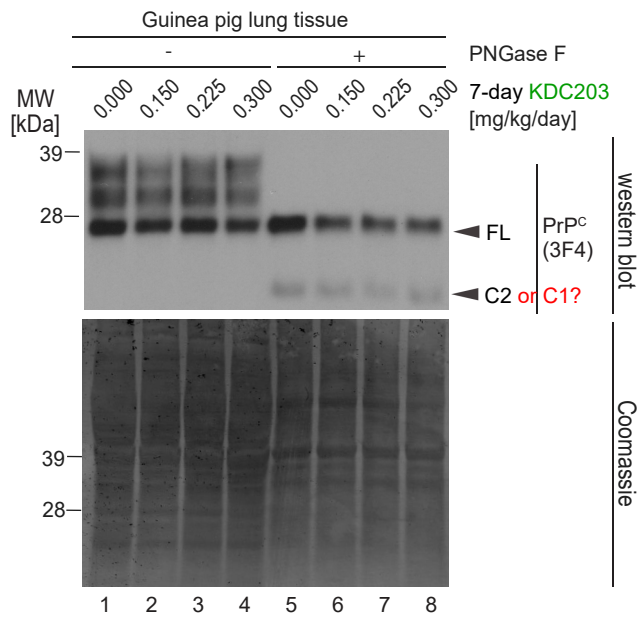

## B

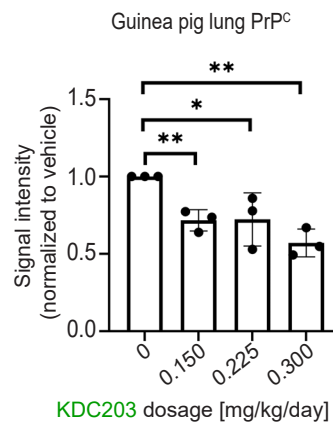

Supplement: pone.0308821.s001.pdf [file pone.0308821.s001.pdf]
